# Supplementary material
Source: PubMed Central journal article supplement (PMC544302)

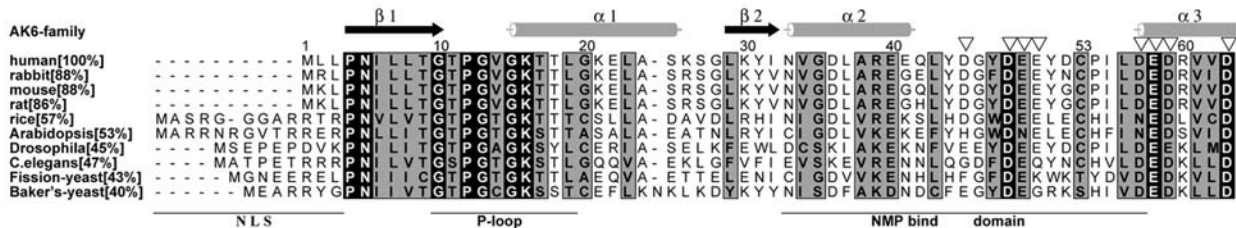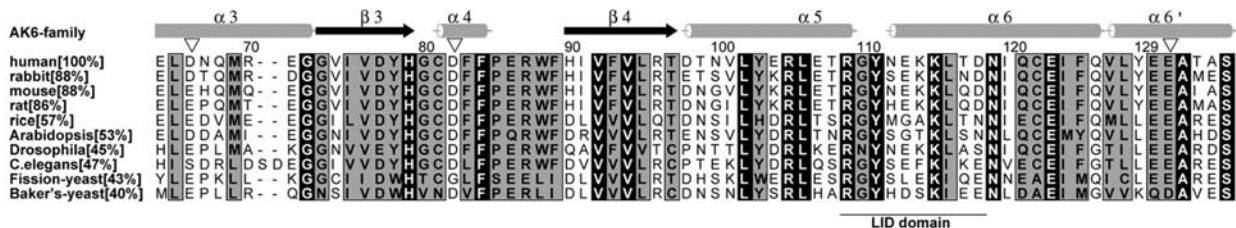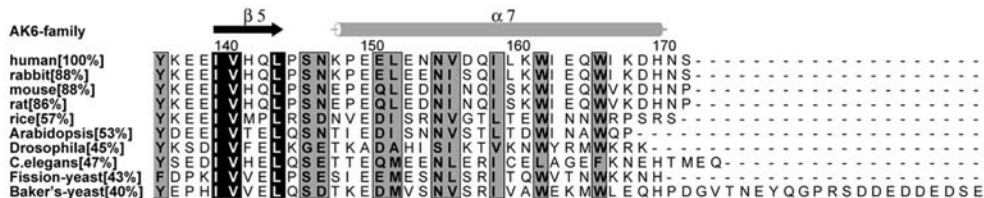

Supplement: pnas_102_2_303__1.pdf [file pnas_102_2_303__1.pdf]

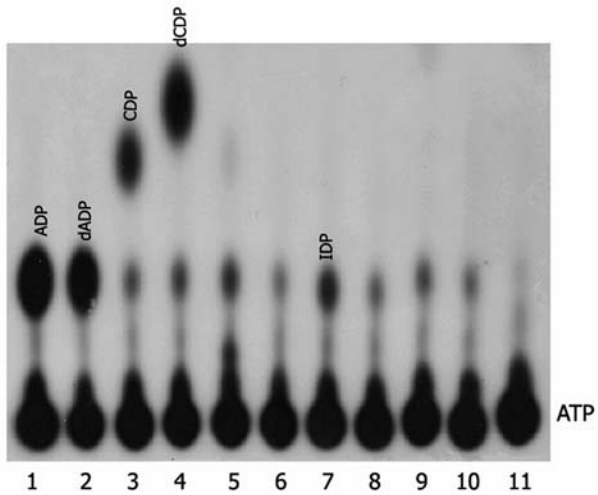

Supplement: pnas_102_2_303__2.pdf [file pnas_102_2_303__2.pdf]

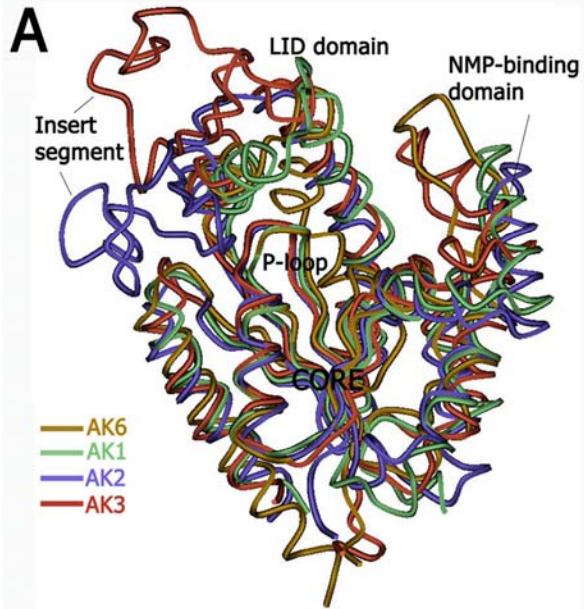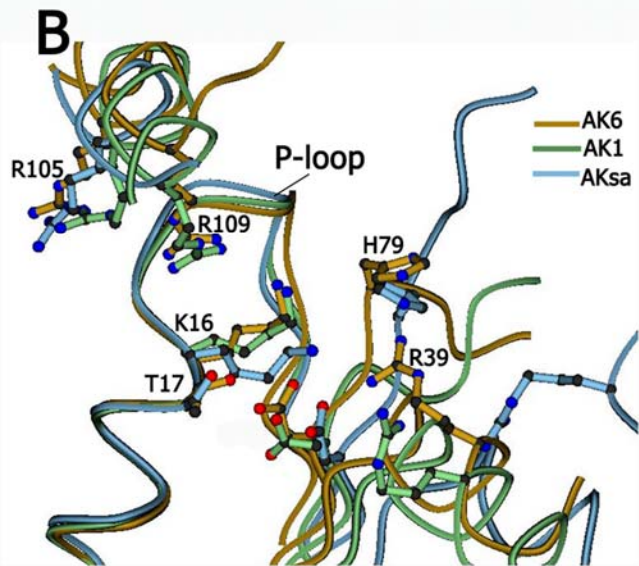

Supplement: pnas_102_2_303__5.pdf [file pnas_102_2_303__5.pdf]
